# Supplementary material for: Impact of Intermittent Screening and Treatment for Malaria among School Children in Kenya: A Cluster Randomised Trial
Source: PLoS Med. 2014 Jan 28;11(1):e1001594. doi: 10.1371/journal.pmed.1001594 (PMC3904819; doi:10.1371/journal.pmed.1001594)
Supplement: Checklist S1 — CONSORT checklist. (DOC) [file pmed.1001594.s004.doc]

**Checklist S1: CONSORT 2010 checklist of information to include when reporting a cluster randomised trial**

| **Section/Topic** | **Item No** | **Standard Checklist item** | **Extension for cluster designs** | **Section and paragraph (P) No *** |
| --- | --- | --- | --- | --- |
| **Title and abstract** | | | |  |
|  | 1a | Identification as a randomised trial in the title | Identification as a cluster randomised trial in the title | **Title** |
| 1b | Structured summary of trial design, methods, results, and conclusions (for specific guidance see CONSORT for abstracts)[[1]](#endnote-2),[[2]](#endnote-3) | See table 2 | **Abstract** |
| **Introduction** | | | |  |
| **Background and objectives** | 2a | Scientific background and explanation of rationale | Rationale for using a cluster design | **Introduction - Paragraphs 1&2**  **Methods – Paragraph 8** |
| 2b | Specific objectives or hypotheses | Whether objectives pertain to the cluster level, the individual participant level or both | **Introduction - Paragraph 2**  **Methods – Paragraph 5** |
| **Methods** | | | |  |
| **Trial design** | 3a | Description of trial design (such as parallel, factorial) including allocation ratio | Definition of cluster and description of how the design features apply to the clusters | **Methods – Paragraphs 5 & 8**  **Figure 2** |
| 3b | Important changes to methods after trial commencement (such as eligibility criteria), with reasons |  | **n/a** |
| **Participants** | 4a | Eligibility criteria for participants | Eligibility criteria for clusters | **Methods – Paragraphs 4 & 6** |
| 4b | Settings and locations where the data were collected |  | **Methods – Paragraphs 3 & 4**  **Figure 1** |
| **Interventions** | 5 | The interventions for each group with sufficient details to allow replication, including how and when they were actually administered | Whether interventions pertain to the cluster level, the individual participant level or both | **Methods – Paragraph 11** |
| **Outcomes** | 6a | Completely defined pre-specified primary and secondary outcome measures, including how and when they were assessed | Whether outcome measures pertain to the cluster level, the individual participant level or both | **Methods – Paragraphs 5, 6, 13, 14, 15 & 16** |
| 6b | Any changes to trial outcomes after the trial commenced, with reasons |  | **N/A** |
| **Sample size** | 7a | How sample size was determined | Method of calculation, number of clusters(s) (and whether equal or unequal cluster sizes are assumed), cluster size, a coefficient of intracluster correlation (ICC or *k*), and an indication of its uncertainty | **Methods – Paragraph 7** |
| 7b | When applicable, explanation of any interim analyses and stopping guidelines |  | **N/A** |
| **Randomisation:** | | | |  |
| **Sequence generation** | 8a | Method used to generate the random allocation sequence |  | **Methods – paragraph 8** |
| 8b | Type of randomisation; details of any restriction (such as blocking and block size) | Details of stratification or matching if used | **Methods – paragraph 8**  **Figure 2** |
| **Allocation concealment mechanism** | 9 | Mechanism used to implement the random allocation sequence (such as sequentially numbered containers), describing any steps taken to conceal the sequence until interventions were assigned | Specification that allocation was based on clusters rather than individuals and whether allocation concealment (if any) was at the cluster level, the individual participant level or both | **Methods – paragraphs 5, 6, 7 & 8**  **Figure 2** |
| **Implementation** | 10 | Who generated the random allocation sequence, who enrolled participants, and who assigned participants to interventions | Replace by 10a, 10b and 10c |  |
|  | 10a |  | Who generated the random allocation sequence, who enrolled clusters, and who assigned clusters to interventions | **Methods – paragraph 8** |
|  | 10b |  | Mechanism by which individual participants were included in clusters for the purposes of the trial (such as complete enumeration, random sampling) | **Methods – paragraphs 6 & 7** |
|  | 10c |  | From whom consent was sought (representatives of the cluster, or individual cluster members, or both), and whether consent was sought before or after randomisation | **Methods – paragraph 2** |
|  |  |  |  |  |
| **Blinding** | 11a | If done, who was blinded after assignment to interventions (for example, participants, care providers, those assessing outcomes) and how |  | **Non-blinded trial**  **Discussion – Paragraph 8** |
| 11b | If relevant, description of the similarity of interventions |  | **N/A** |
| **Statistical methods** | 12a | Statistical methods used to compare groups for primary and secondary outcomes | How clustering was taken into account | **Methods – paragraphs 18, 19 & 20** |
| 12b | Methods for additional analyses, such as subgroup analyses and adjusted analyses |  | **Methods – paragraphs 20 & 21**  **Text S3** |
| **Results** | | | |  |
| **Participant flow (a diagram is strongly recommended)** | 13a | For each group, the numbers of participants who were randomly assigned, received intended treatment, and were analysed for the primary outcome | For each group, the numbers of clusters that were randomly assigned, received intended treatment, and were analysed for the primary outcome | **Figure 3** |
| 13b | For each group, losses and exclusions after randomisation, together with reasons | For each group, losses and exclusions for both clusters and individual cluster members | **Results – Paragraphs 4 & 5**  **Discussion – Paragraph 2**  **Figure 3** |
| **Recruitment** | 14a | Dates defining the periods of recruitment and follow-up |  | **Methods – Paragraphs 6 & 13**  **Results – Paragraphs 1, 4 & 5**  **Figure 3** |
| 14b | Why the trial ended or was stopped |  | **n/a** |
| **Baseline data** | 15 | A table showing baseline demographic and clinical characteristics for each group | Baseline characteristics for the individual and cluster levels as applicable for each group | **Results – Paragraphs 1 & 2**  **Table 1** |
| **Numbers analysed** | 16 | For each group, number of participants (denominator) included in each analysis and whether the analysis was by original assigned groups | For each group, number of clusters included in each analysis | **Figure 3** |
| **Outcomes and estimation** | 17a | For each primary and secondary outcome, results for each group, and the estimated effect size and its precision (such as 95% confidence interval) | Results at the individual or cluster level as applicable and a coefficient of intracluster correlation (ICC or k) for each primary outcome | **Tables 1, 3, 4 and 5**  **Results – Paragraphs 7 & 8** |
| 17b | For binary outcomes, presentation of both absolute and relative effect sizes is recommended |  | **Tables 1, 3, 4 and 5** |
| **Ancillary analyses** | 18 | Results of any other analyses performed, including subgroup analyses and adjusted analyses, distinguishing pre-specified from exploratory |  | **Tables S1, S2, S3, S4, S5, S6, S7, S8, S9 and S10** |
| **Harms** | 19 | All important harms or unintended effects in each group (for specific guidance see CONSORT for harms[[3]](#endnote-4)) |  | **Results – Paragraphs 8 & 9** |
| **Discussion** | | | |  |
| **Limitations** | 20 | Trial limitations, addressing sources of potential bias, imprecision, and, if relevant, multiplicity of analyses |  | **Discussion – Paragraphs 3, 4, 5 & 7** |
| **Generalisability** | 21 | Generalisability (external validity, applicability) of the trial findings | Generalisability to clusters and/or individual participants (as relevant) | **Discussion – Paragraph 6**  **Conclusion** |
| **Interpretation** | 22 | Interpretation consistent with results, balancing benefits and harms, and considering other relevant evidence |  | **Discussion – Paragraphs 2 to 7**  **Conclusion** |
| **Other information** | | |  |  |
| **Registration** | 23 | Registration number and name of trial registry |  | **Abstract**  **Methods – Paragraph 6** |
| **Protocol** | 24 | Where the full trial protocol can be accessed, if available |  | **Methods – Paragraph 1**  **Text S1** |
| **Funding** | 25 | Sources of funding and other support (such as supply of drugs), role of funders |  | **Funding statement** |

** Note: page numbers optional depending on journal requirements*

**Table 2: Extension of CONSORT for abstractsError: Reference source not found,Error: Reference source not found to reports of cluster randomised trials**

| **Item** | **Standard Checklist item** | **Extension for cluster trials** | **Included** |
| --- | --- | --- | --- |
| **Title** | Identification of study as randomised | Identification of study as cluster randomised | **Y** |
| **Trial design** | Description of the trial design (e.g. parallel, cluster, non-inferiority) |  | **Y** |
| **Methods** |  |  |  |
| **Participants** | Eligibility criteria for participants and the settings where the data were collected | Eligibility criteria for clusters | **Y** |
| **Interventions** | Interventions intended for each group |  | **Y** |
| **Objective** | Specific objective or hypothesis | Whether objective or hypothesis pertains to the cluster level, the individual participant level or both | **Y** |
| **Outcome** | Clearly defined primary outcome for this report | Whether the primary outcome pertains to the cluster level, the individual participant level or both | **Y** |
| **Randomization** | How participants were allocated to interventions | How clusters were allocated to interventions |  |
| **Blinding (masking)** | Whether or not participants, care givers, and those assessing the outcomes were blinded to group assignment |  | **Y** |
| **Results** |  |  |  |
| **Numbers randomized** | Number of participants randomized to each group | Number of clusters randomized to each group |  |
| **Recruitment** | Trial status[[4]](#footnote-2) |  |  |
| **Numbers analysed** | Number of participants analysed in each group | Number of clusters analysed in each group | **Y** |
| **Outcome** | For the primary outcome, a result for each group and the estimated effect size and its precision | Results at the cluster or individual participant level as applicable for each primary outcome | **Y** |
| **Harms** | Important adverse events or side effects |  | **NA** |
| **Conclusions** | General interpretation of the results |  | **Y** |
| **Trial registration** | Registration number and name of trial register |  | **Y** |
| **Funding** | Source of funding |  | **Y** |
|  |  |  |  |

**REFERENCES**

1. Hopewell S, Clarke M, Moher D, Wager E, Middleton P, Altman DG, et al. CONSORT for reporting randomised trials in journal and conference abstracts. *Lancet* 2008, 371:281-283 [↑](#endnote-ref-2)
2. Hopewell S, Clarke M, Moher D, Wager E, Middleton P, Altman DG at al (2008) CONSORT for reporting randomized controlled trials in journal and conference abstracts: explanation and elaboration. *PLoS Med* 5(1): e20 [↑](#endnote-ref-3)
3. Ioannidis JP, Evans SJ, Gotzsche PC, O'Neill RT, Altman DG, Schulz K, Moher D. Better reporting of harms in randomized trials: an extension of the CONSORT statement. *Ann Intern Med* 2004; 141(10):781-788. [↑](#endnote-ref-4)
4. Relevant to Conference Abstracts [↑](#footnote-ref-2)
